# Supplementary material for: Antitumor effect of CAR-T cells targeting transmembrane tumor necrosis factor alpha combined with PD-1 mAb on breast cancers
Source: PubMed Central journal article supplement — J Immunother Cancer. 2023 Jan 31;11(1):e003837. doi: 10.1136/jitc-2021-003837 (PMC10098269; doi:10.1136/jitc-2021-003837), 2023-01-31
Supplement: jitc-2021-003837supp001.pdf [file jitc-2021-003837supp001.pdf]

**The antitumor effect of CAR-T cells targeting transmembrane tumor necrosis factor-alpha combined with PD-1 mAb on breast cancers**

Hongping Ba<sup>1</sup>, Zigang Dai<sup>2</sup>, Zunyue Zhang<sup>1</sup>, Peng Zhang<sup>1</sup>, Bingjiao Yin<sup>1</sup>, Jing Wang<sup>1</sup>,  
Zhuoya Li<sup>1</sup>, and Xiaoxi Zhou<sup>2§</sup>

<sup>1</sup> Department of Hematology, Tongji Hospital, Huazhong University of Science and Technology, Wuhan, Hubei, China

<sup>2</sup> Department of Immunology, Tongji Medical College, Huazhong University of Science and Technology, Wuhan, Hubei, China

**Supplementary Table 1. Antibodies used in flow cytometry and western blotting**

| <b>Antibody</b>                     | <b>Catalog number</b> | <b>Company</b>                              |
|-------------------------------------|-----------------------|---------------------------------------------|
| Anti-F(ab') <sub>2</sub> of IgG-APC | 109-136-097           | Jackson ImmunoResearch, West Grove, PA, USA |
| Anti-CD3-percp-cy5.5                | 45-0037-42            | eBioscience, San Diego, CA, USA             |
| Anti-CD3-APC-cy7                    | 561800                | BD Pharmingen, San Diego, CA, USA           |
| Anti-CD4-FITC                       | 11-0041-82            | eBioscience, San Diego, CA, USA             |
| Anti-CD8-PE                         | 12-0081-82            | eBioscience, San Diego, CA, USA             |
| Anti-CD45RO-Pe-cy7                  | 25-0457-42            | eBioscience, San Diego, CA, USA             |
| Anti-CD62L-FITC                     | 11-0621-82            | eBioscience, San Diego, CA, USA             |
| Anti-CCR7-PE                        | 12-1979-42            | eBioscience, San Diego, CA, USA             |
| Anti-PD1-PE                         | 329906                | Biolegend, San Diego, CA, USA               |
| Anti-mouse IgG-FITC                 | ZF-0312               | FeiYi, Wuhan, China                         |
| Anti-human IgG-FITC                 | ZF-0308               | FeiYi, Wuhan, China                         |
| Anti-CD3                            | A19017                | Abclonal, Wuhan, China                      |
| Anti-PD-L1                          | A20344                | Abclonal, Wuhan, China                      |
| Anti-IκB                            | A11397                | Abclonal, Wuhan, China                      |
| Anti-p38                            | sc-7972               | Santa Cruz Biotechnology, CA, USA           |
| Anti-pp38                           | 4511                  | Cell signaling Technology, MA, USA          |
| Anti-p65                            | A19653                | Abclonal, Wuhan, China                      |
| Anti-pp65                           | 3033                  | Cell signaling Technology, MA, USA          |
| Anti-AKT                            | 10176-2-AP            | Proteintech, Wuhan, China                   |
| Anti-pAKT                           | 4060                  | Cell signaling Technology, MA, USA          |
| Anti-actin                          | AC026                 | Abclonal, Wuhan, China                      |
| Anti-mouse IgG-HRP                  | 7076                  | Cell signaling Technology, MA, USA          |
| Anti-rabbit IgG-HRP                 | 7074                  | Cell signaling Technology, MA, USA          |

## Supplementary Figures

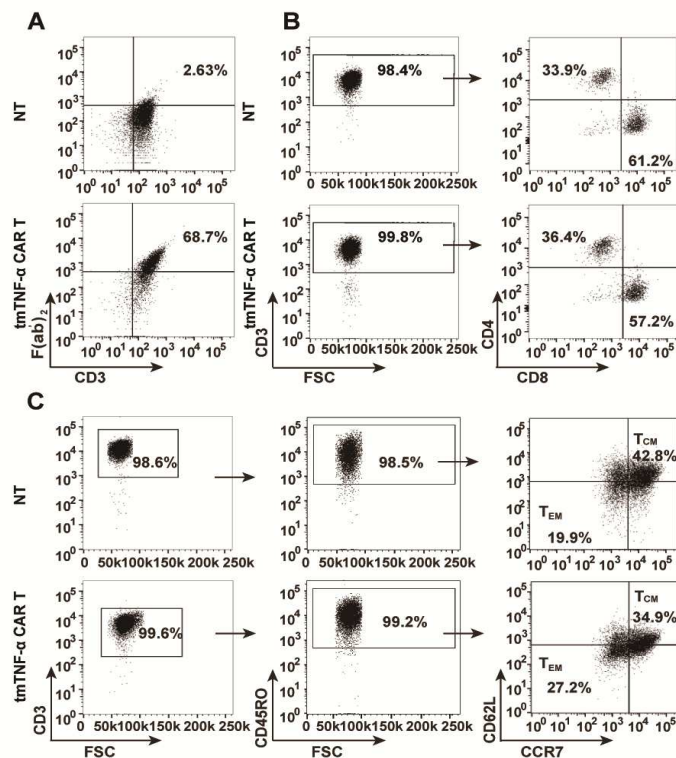**Supplementary Fig. S1. T cell subsets and memory phenotypes of tmTNF-α CAR-T**

**cells.** CD3<sup>+</sup> T cells isolated from UBC were transduced with tmTNF-α CAR gene-containing lentivirus and further cultured for 14 days in the presence of anti-CD3/anti-CD28 and IL-2. Non-transduced T (NT) cells served as a control. (A) F(ab')<sub>2</sub> antibody was used to detect the transduction efficiency of tmTNF-α CAR by flow cytometry and representative cytograms. (B) Representative cytograms of CD4<sup>+</sup> and CD8<sup>+</sup> T cell subsets. (C) Analysis of the expression of CD45RO, CD62L and CCR7 in CD3-positive T cells by flow cytometry and representative cytograms.

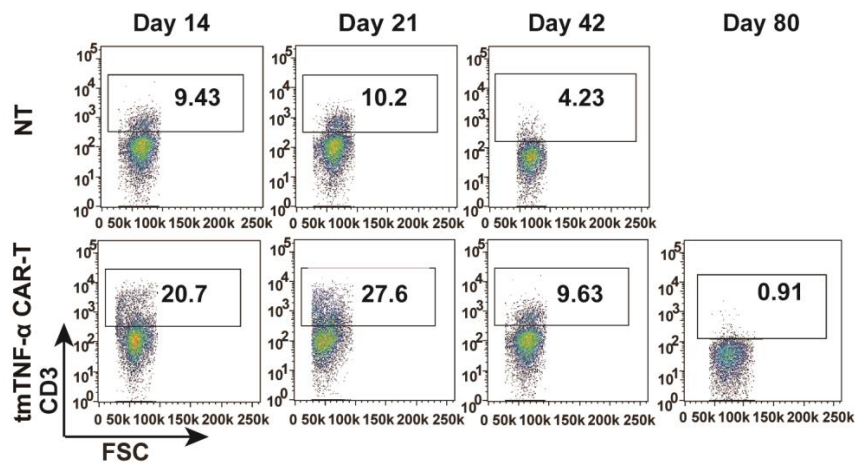

**Supplementary Fig. S2. Dynamic changes of CAR-T cells in vivo.** NOD/SCID mice were inoculated subcutaneously with  $2 \times 10^6$  MDA-MB-231 cells on the right mamma pat and intravenously administered with  $5 \times 10^6$  tmTNF- $\alpha$  CAR-T cells or NT cells on Days 7 and 14. Human CD3<sup>+</sup> T cells in the periphery blood were analyzed at indicated time points by flow cytometry. Representative cytograms of CD3 T cells in the blood. The data of NT treatment group on Day 80 were missing due to the death of mice.

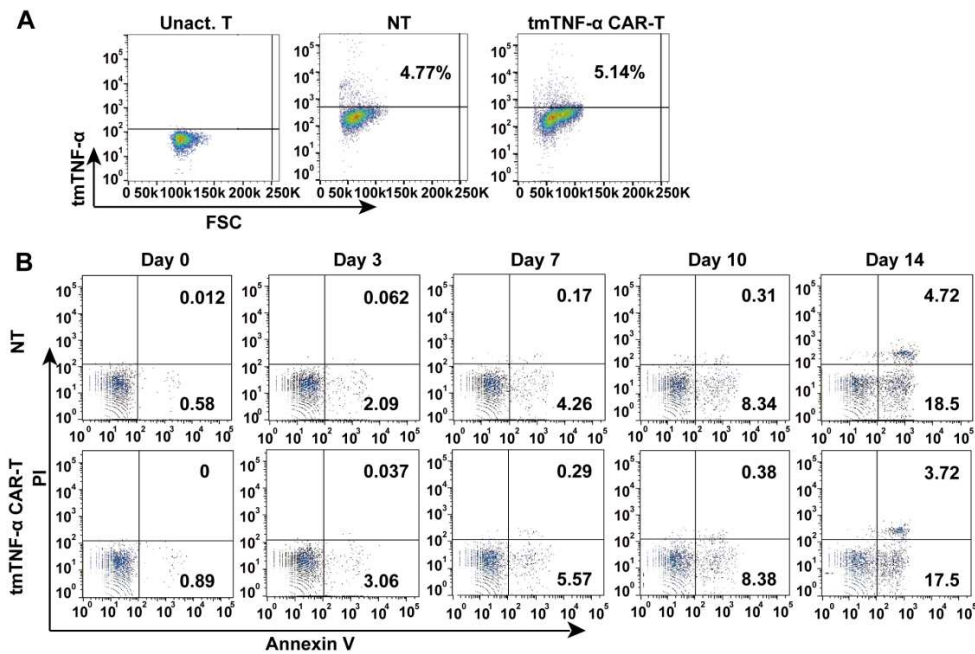

**Supplementary Fig. S3. tmTNF- $\alpha$  expression and apoptosis of NT and CAR-T cells.** (A)

tmTNF- $\alpha$  expression by unactivated T cells (Unact. T cells), NT and CAR-T cells was

detected by flow cytometry and representative cytograms. (B) tmTNF- $\alpha$  CAR-T and NT cells

were cultured in medium supplemented with IL-2 (50 IU/ml) in plates coated with anti-

CD3/anti-CD28. Apoptosis of NT and CAR-T cells were analyzed at indicated time points by

Annexin V/PI and representative cytograms of flow cytometry.

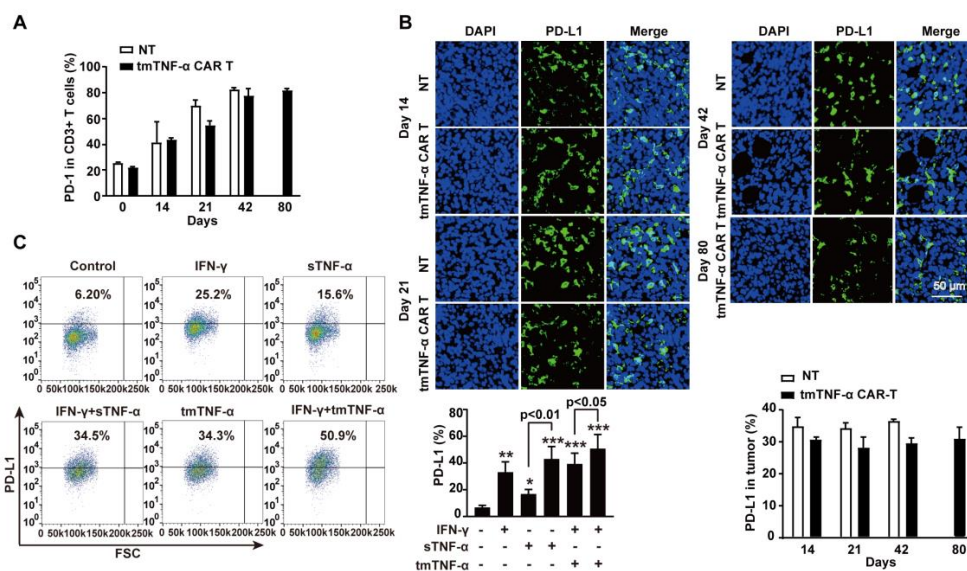

**Supplementary Fig. S4. Dynamic changes of PD-1 expression on tmTNF- $\alpha$  CAR-T cells and PD-L1 expression on tumor cells in vivo.** NOD/SCID mice were inoculated subcutaneously with  $2 \times 10^6$  MDA-MB-231 cells on the right mamma pat and intravenously administered with  $5 \times 10^6$  tmTNF- $\alpha$  CAR-T cells or NT cells on Day 7 and 14. (A) The PD-1 expression in CD3 T cells in the tumor tissues was analyzed by flow cytometry (n=3). (B) PD-L1 expression in tumor tissue sections (magnification  $\times 200$ ) determined by indirect immunofluorescence and quantitative data (n=3). The data of NT treatment group on Day 80 were missing due to the death of mice. The data in vivo represent means  $\pm$  SEM. (C) MDA-MB-468 cells were co-cultured for 24 h with 100 ng/ml sTNF- $\alpha$  or tmTNF- $\alpha$  stably transfected, fixed 293T cells at an E/T ratio of 10:1 in the presence of 0.25 ng/ml IFN- $\gamma$ . PD-L1 expression was detected by flow cytometry. The data represent means  $\pm$  SEM of three independent experiments. \*P < 0.05, \*\*P < 0.01, \*\*\*P < 0.001 versus control.

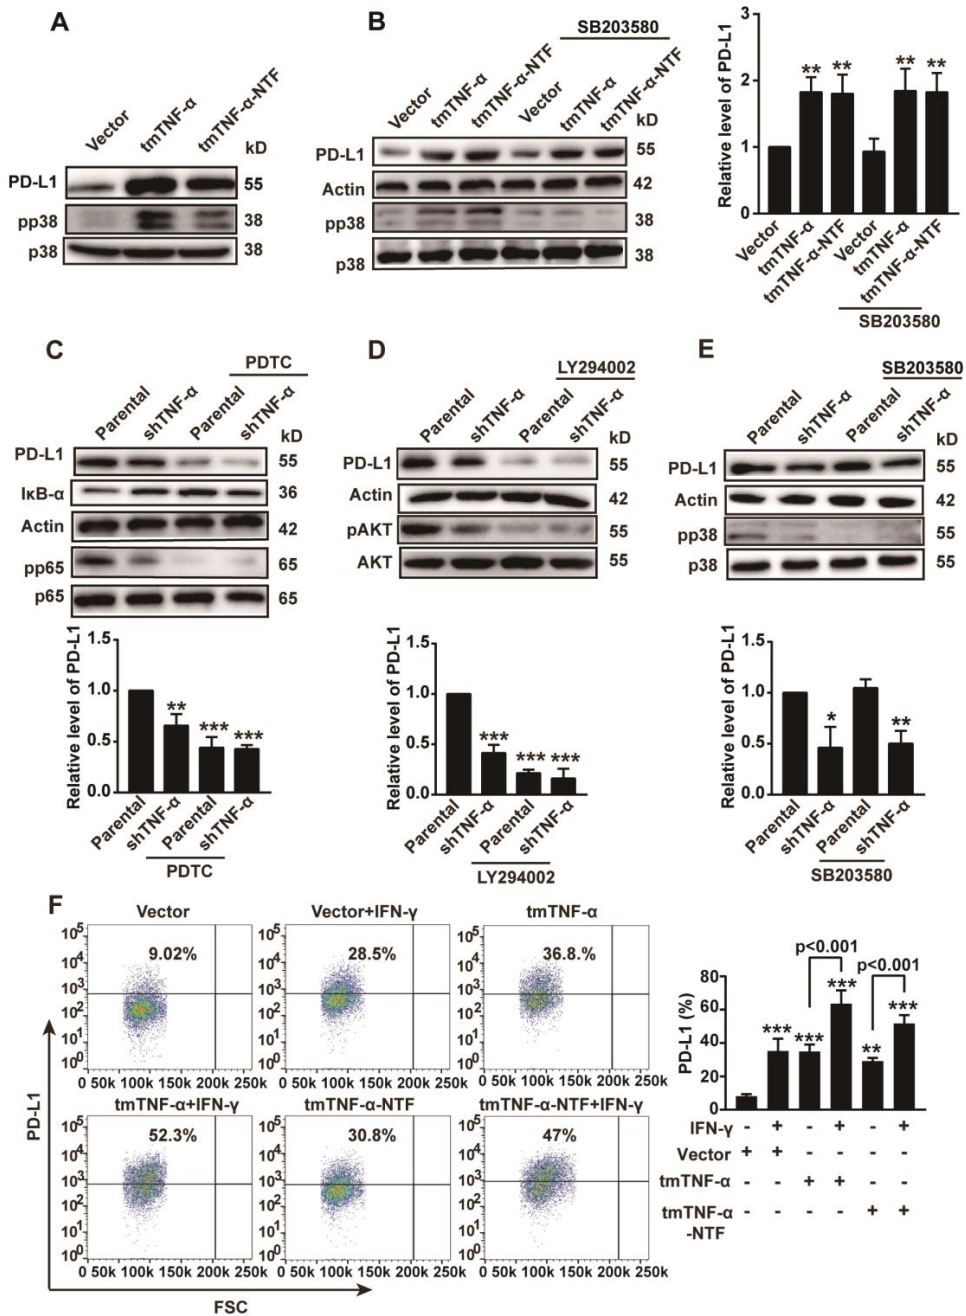

**Supplementary Fig. S5. PD-L1 expression is regulated by tmTNF-α in breast cancer cells.** (A, B) After transfection of MDA-MB-468 cells with TNF-α or tmTNF-α-NTF for 24 h, the transfectants were treated with or without a p38 inhibitor, 0.6 M SB203580 for 24 h. Representative images of western blot for PD-L1 expression and p38 phosphorylation and



quantitative data. (C, E) shTNF- $\alpha$  stably transfected or parental MDA-MB-231 cells were treated with 100  $\mu$ M PDTC (C), 50  $\mu$ M LY294002 (D) or 0.6 M SB203580 (E) for 24 h. Representative images of western blot for PD-L1 expression, I $\kappa$ B $\alpha$  degradation and the phosphorylation of p65, AKT and p38, and quantitative data. (F) TNF- $\alpha$  or tmTNF- $\alpha$ -NTF transfectants were stimulated for 24 h with 0.25 ng/ml IFN- $\gamma$  after 48-h transfection, PD-L1 expression was detected by flow cytometry. All quantitative data represent means  $\pm$  SEM of three independent experiments. \*P < 0.05, \*\*P < 0.01, \*\*\*P < 0.001 versus parental except F (versus vector).



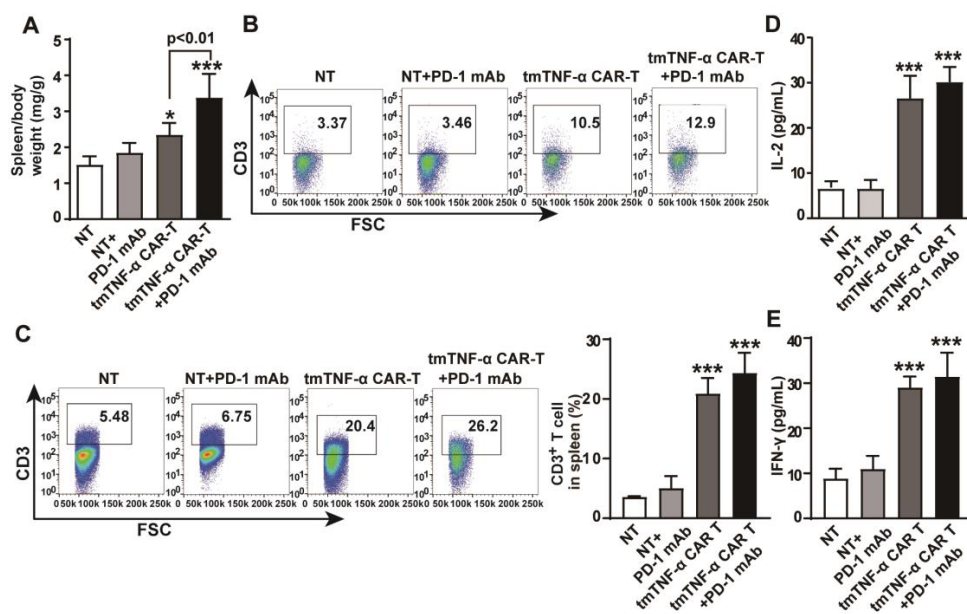

### Supplementary Fig. S6. The effect of PD-1 antibody on the tmTNF- $\alpha$ CAR-T therapy.

NOD/SCID mice were inoculated subcutaneously with  $2 \times 10^6$  MDA-MB-231 cells on the right mamma pat, and intravenously administered with  $5 \times 10^6$  tmTNF- $\alpha$  CAR-T cells or NT cells on Days 7 and 14. 200  $\mu$ g of PD-1 mAb was intraperitoneally injected every three days, and started on Day 7 prior to infusion of tmTNF- $\alpha$  CAR-T cells. Mice were sacrificed on Day 49 (n=6 per group). (A) Spleen weight/body weight. Representative cytograms of human CD3 T cells in the periphery blood (B) and the spleen (C) analyzed by flow cytometry and quantitative data. (D, E) Serum levels of IL-2 and IFN- $\gamma$  were detected by ELISA. All quantitative data represent means  $\pm$  SEM. \*\*\*P < 0.001 versus NT.
