# Supplementary figures and images for: Antitumor effect of CAR-T cells targeting transmembrane tumor necrosis factor alpha combined with PD-1 mAb on breast cancers
Source: PubMed Central journal article supplement — J Immunother Cancer. 2023 Jan 31;11(1):e003837. doi: 10.1136/jitc-2021-003837 (PMC10098269; doi:10.1136/jitc-2021-003837), 2023-01-31

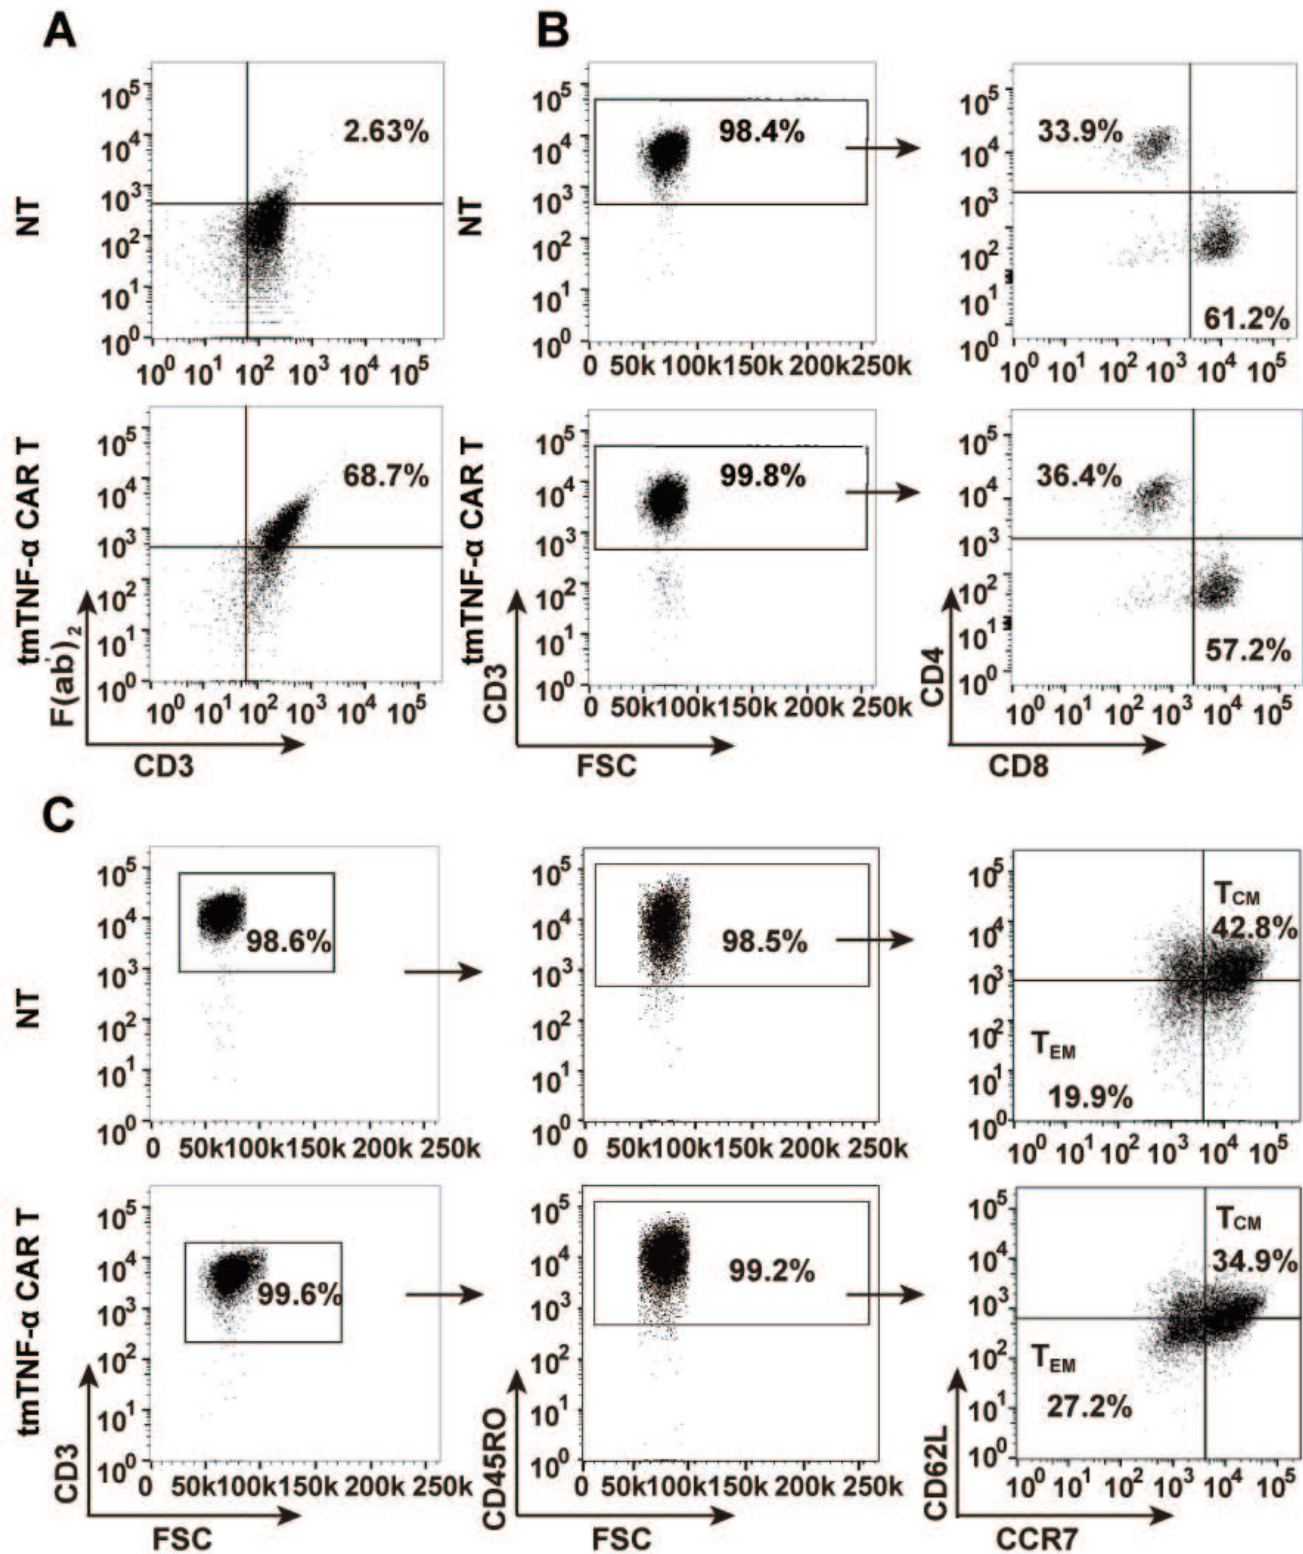

Supplement: jitc-2021-003837supp002.pdf [file jitc-2021-003837supp002.pdf]

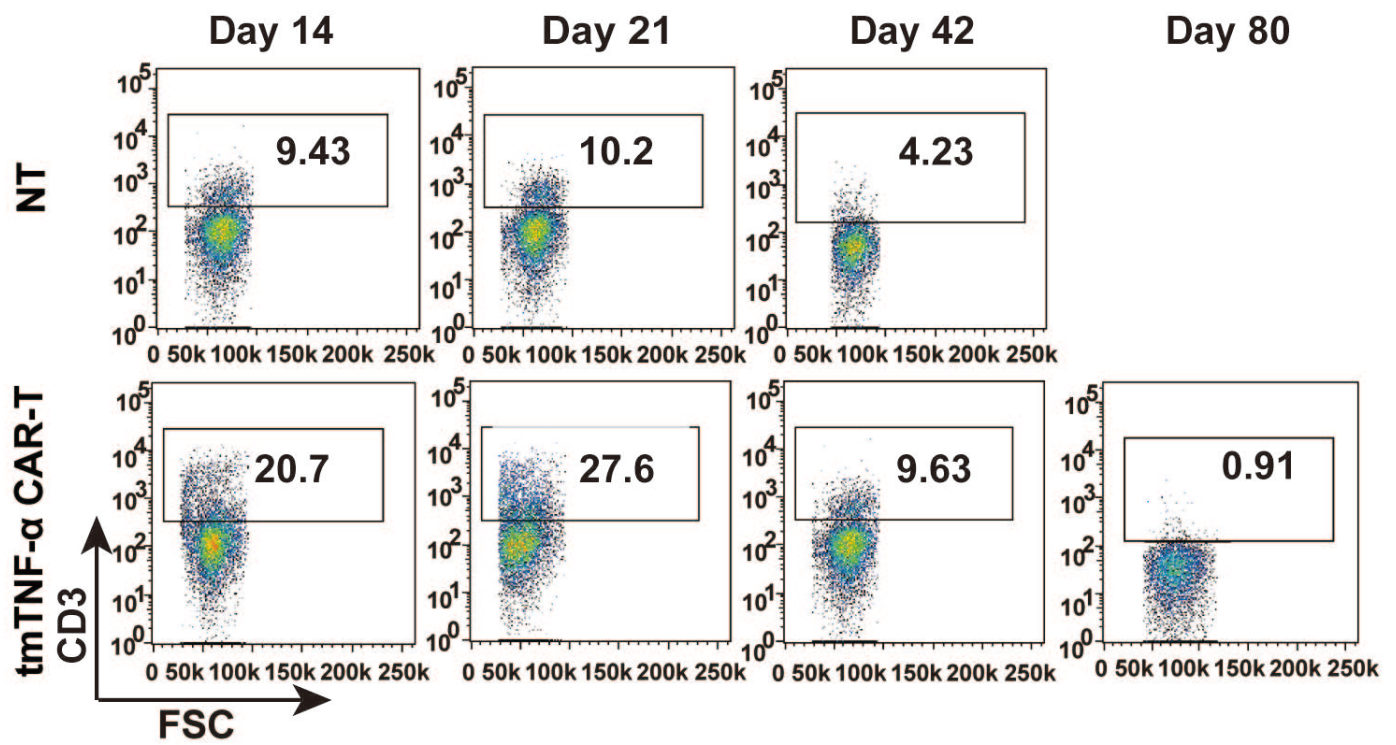

Supplement: jitc-2021-003837supp003.pdf [file jitc-2021-003837supp003.pdf]

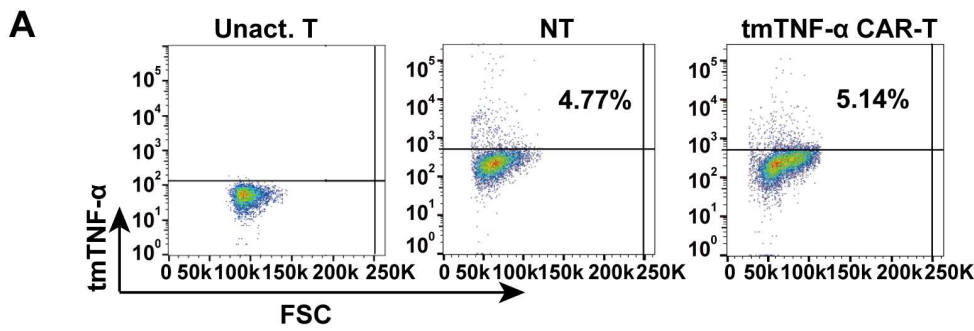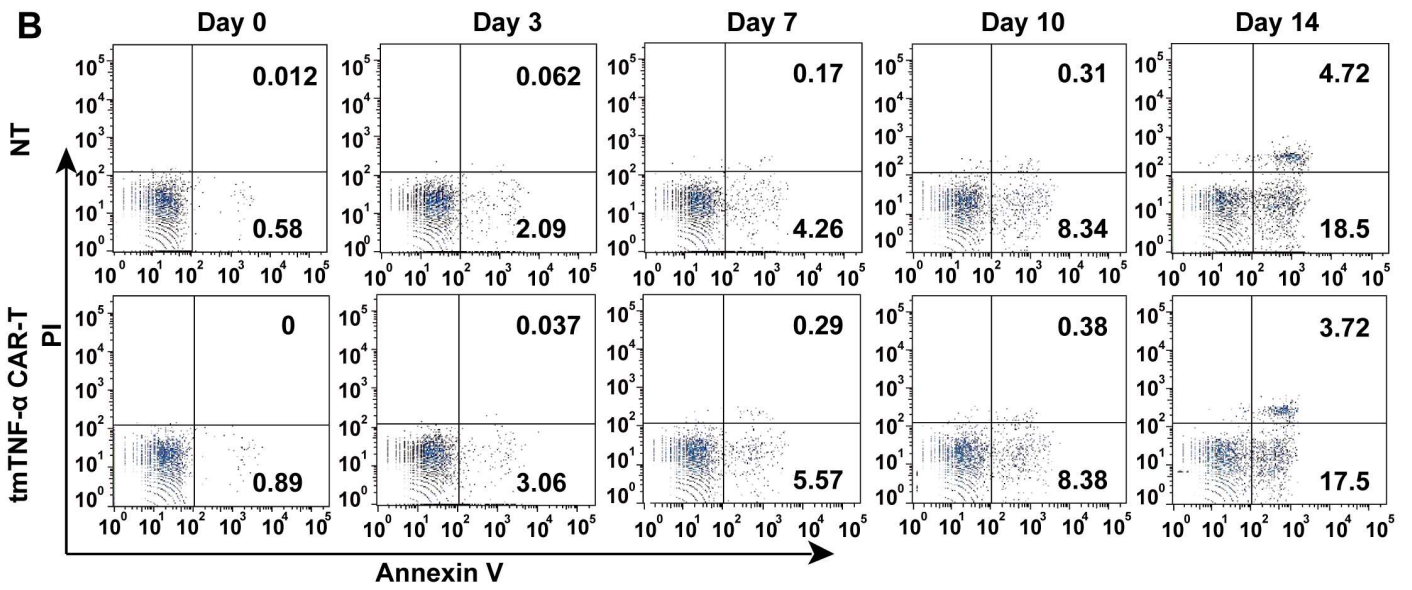

Supplement: jitc-2021-003837supp004.pdf [file jitc-2021-003837supp004.pdf]

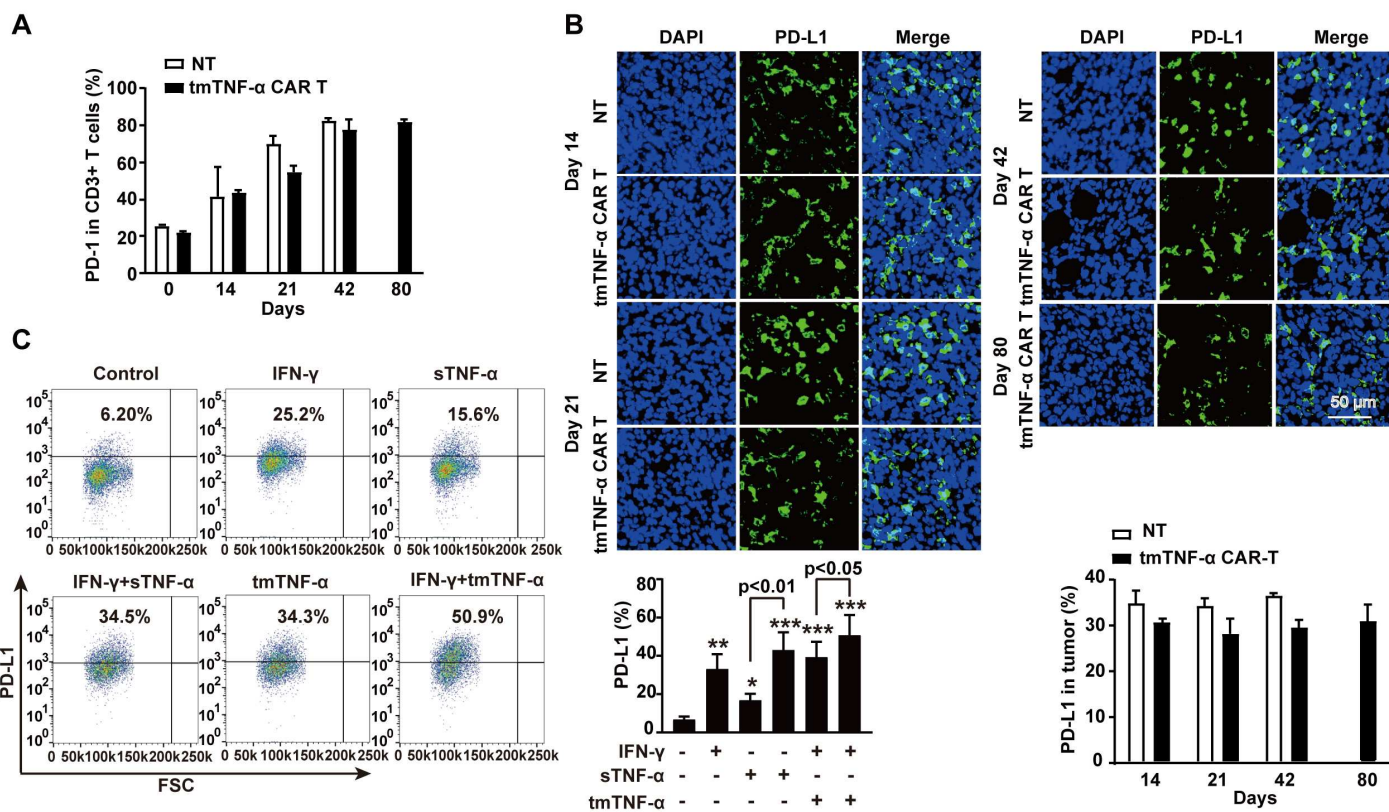

Supplement: jitc-2021-003837supp005.pdf [file jitc-2021-003837supp005.pdf]

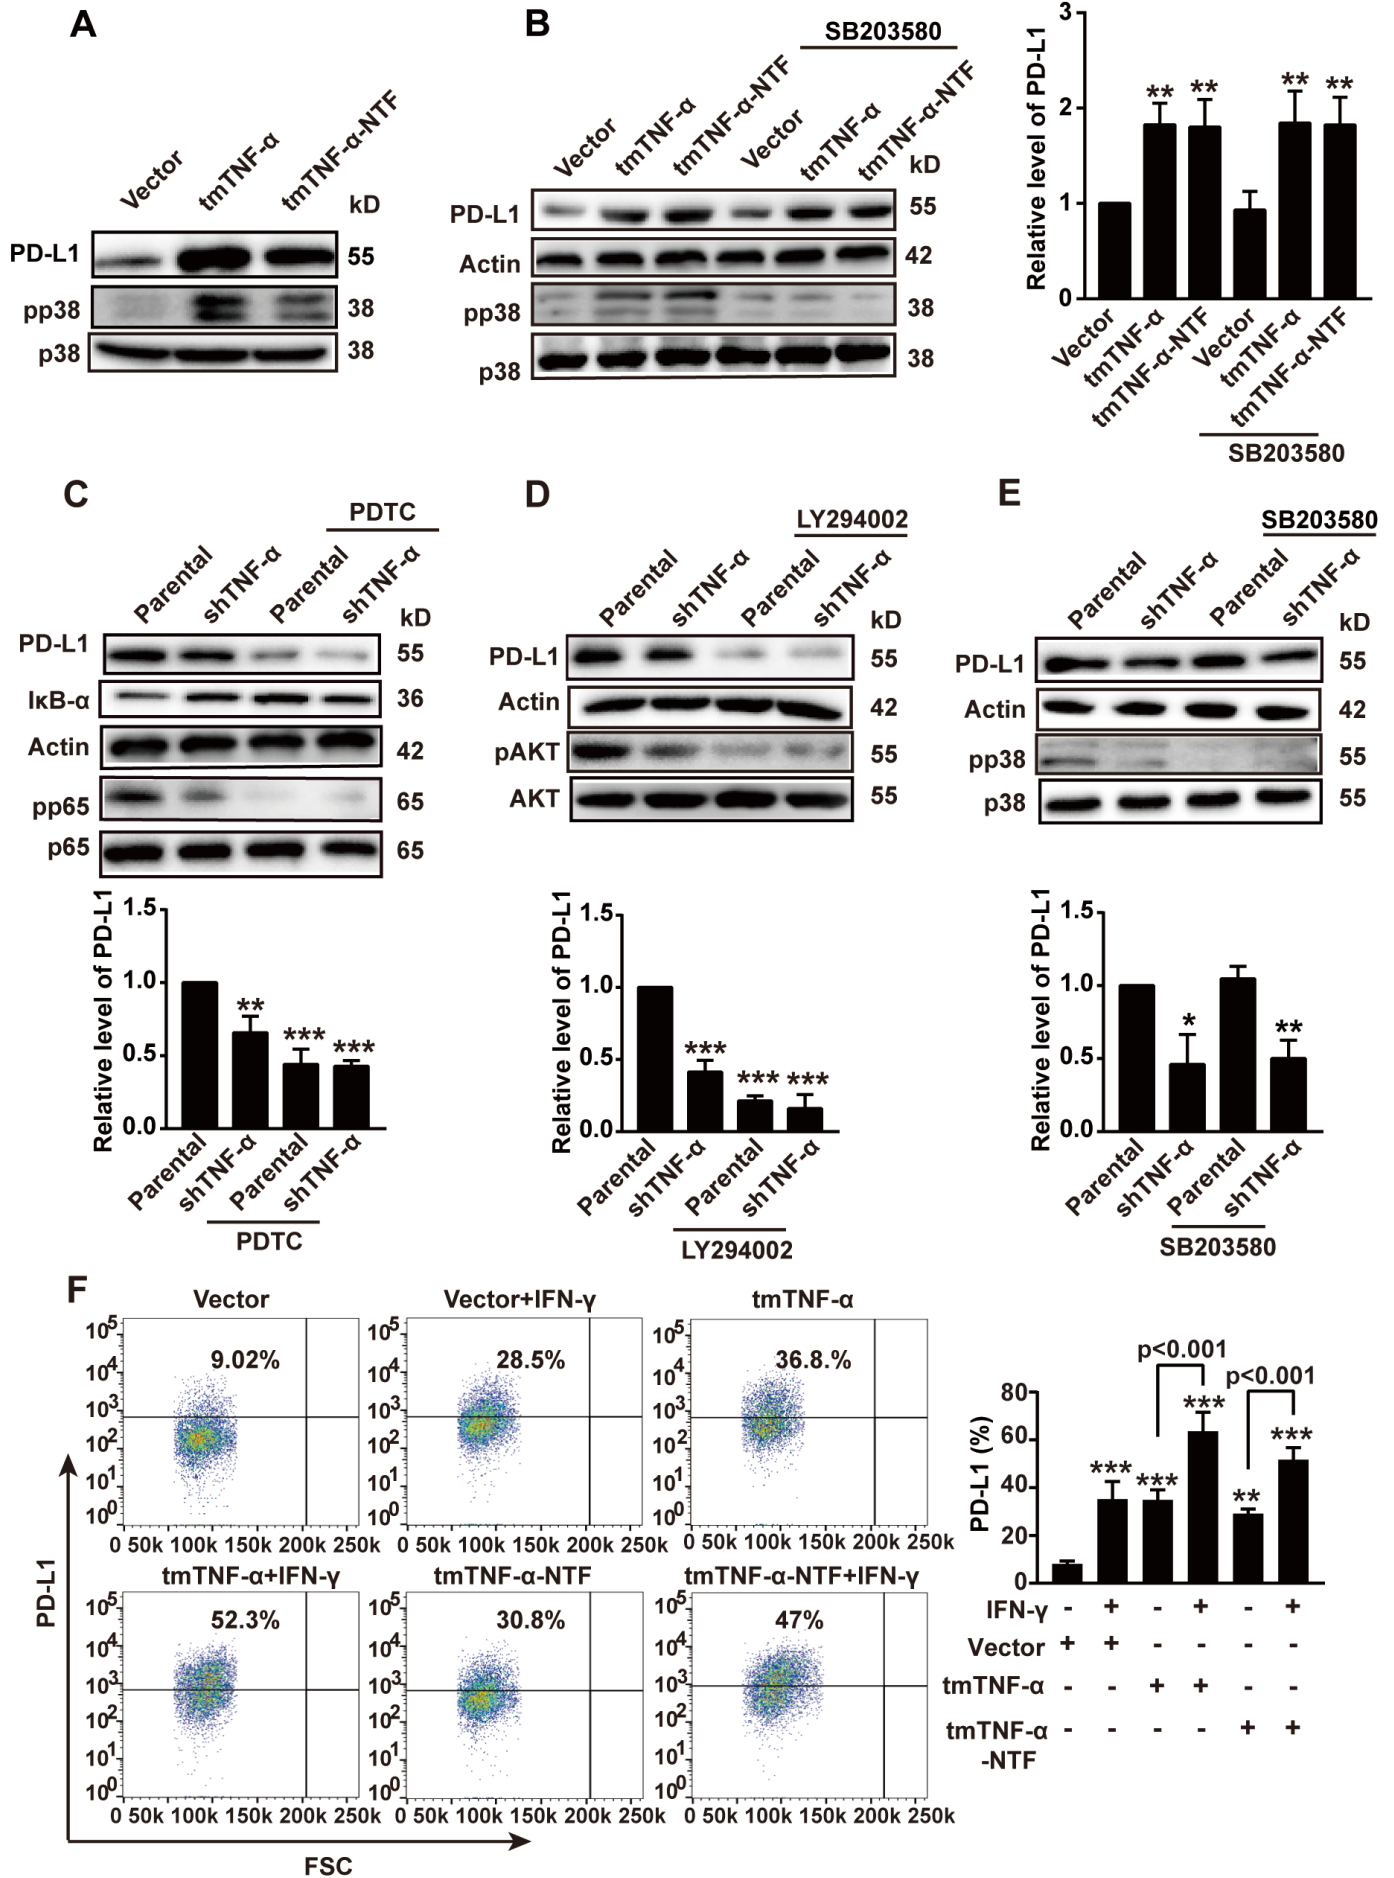

Supplement: jitc-2021-003837supp006.pdf [file jitc-2021-003837supp006.pdf]

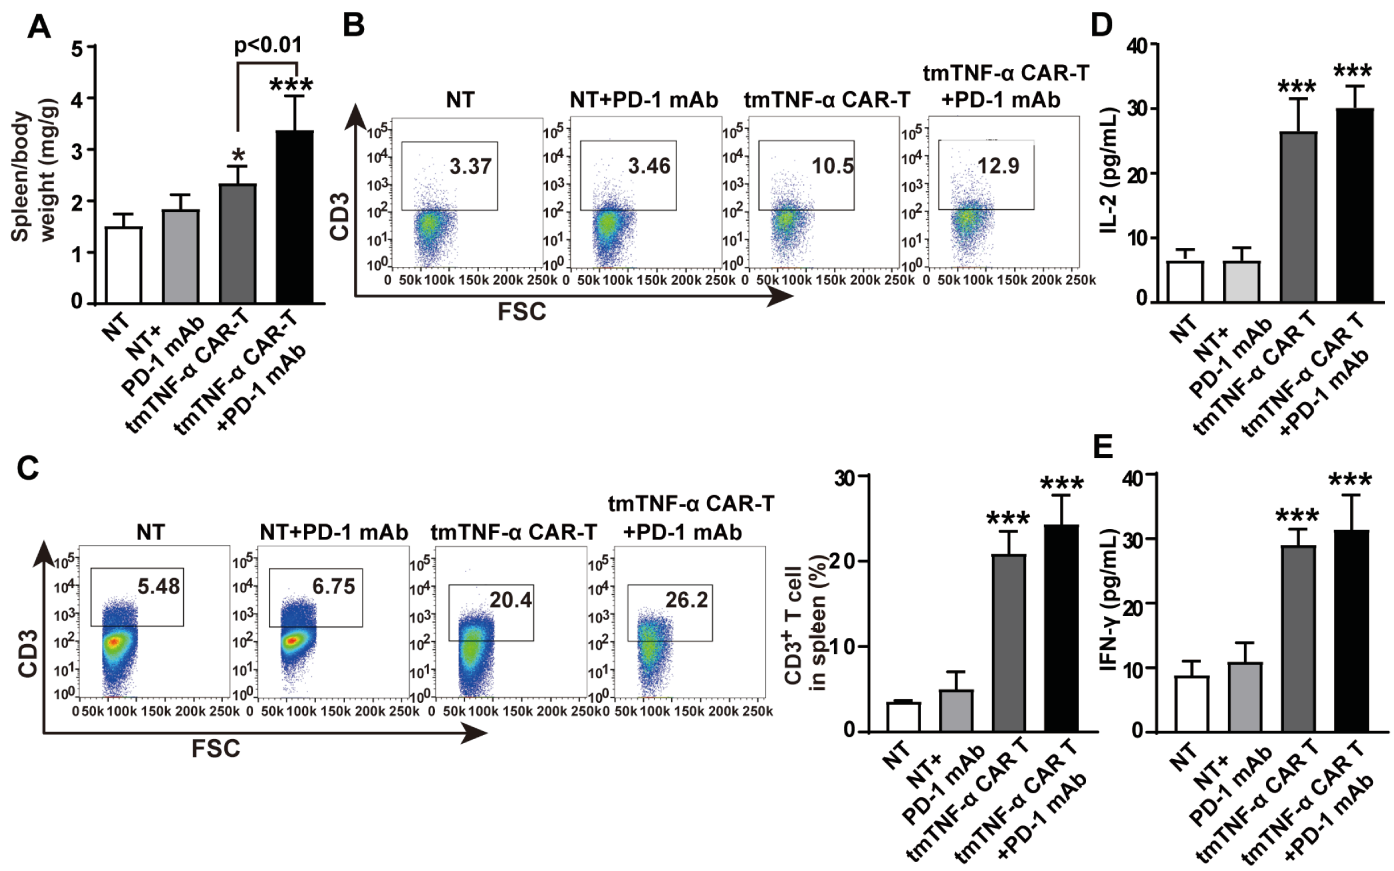

Supplement: jitc-2021-003837supp007.pdf [file jitc-2021-003837supp007.pdf]
